# Supplementary material for: Enhancing MRI of liver metastases with a zwitterionized biodegradable dendritic contrast agent
Source: Royal Society of Chemistry journal article supplement (doi:10.1039/c7bm00126f), 2017-01-01
Supplement: c7bm00126f1.pdf [file c7bm00126f1.pdf]

## Supplementary Information

### Enhancing MRI of liver metastases with a zwitterionized biodegradable dendritic contrast agent

Xiaoxuan Zhou<sup>1,†</sup>, Mingzhou Ye<sup>2,†</sup>, Yuxin Han<sup>2</sup>, Jianbin Tang<sup>\*2</sup>, Yue Qian<sup>1</sup>, Hongjie Hu<sup>\*1</sup>, Youqing Shen<sup>2</sup>

<sup>1</sup>Department of Radiology, Sir Run Run Shaw Hospital (SRRSH) of School of Medicine, Zhejiang University, Hangzhou, Zhejiang, 310027, China.

<sup>2</sup>Key Laboratory of Biomass Chemical Engineering of Ministry of Education, Center for Bionanoengineering, and College of Chemical and Biological Engineering, Zhejiang University, Hangzhou, Zhejiang, 310027, China.

<sup>†</sup> equally contributing authors

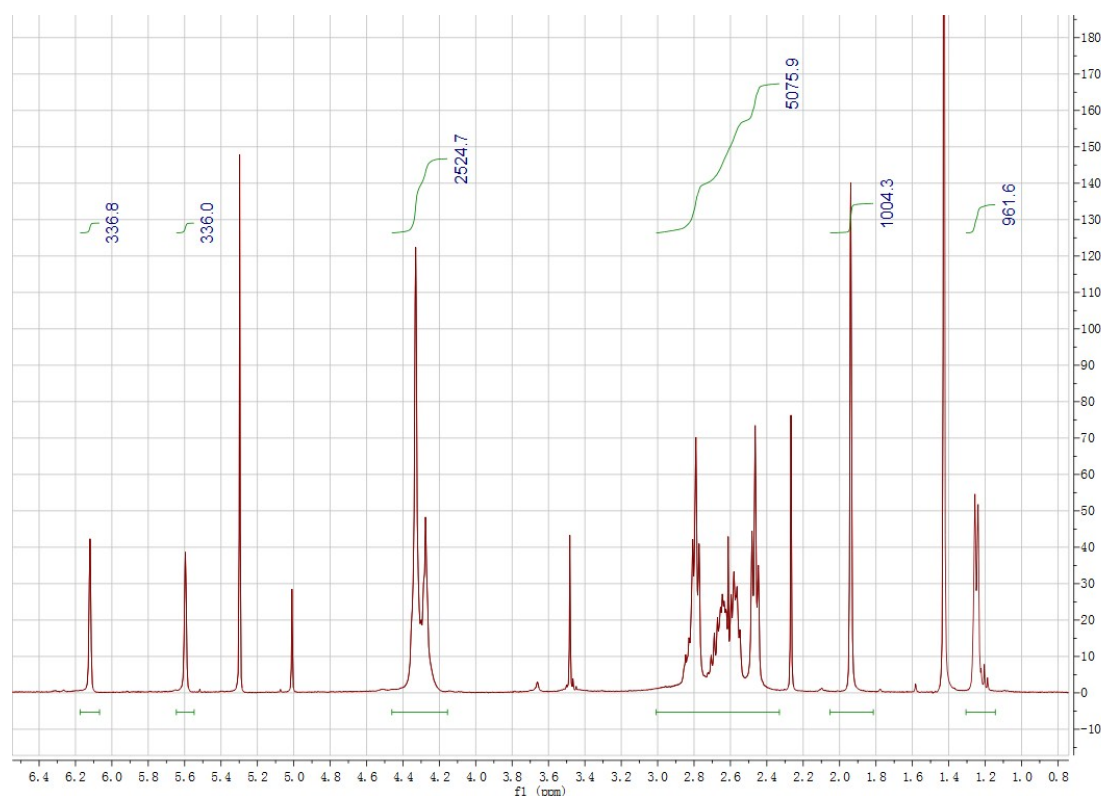

Figure S1. <sup>1</sup>H NMR spectrum of G4 dendrimer in DCCl<sub>3</sub>

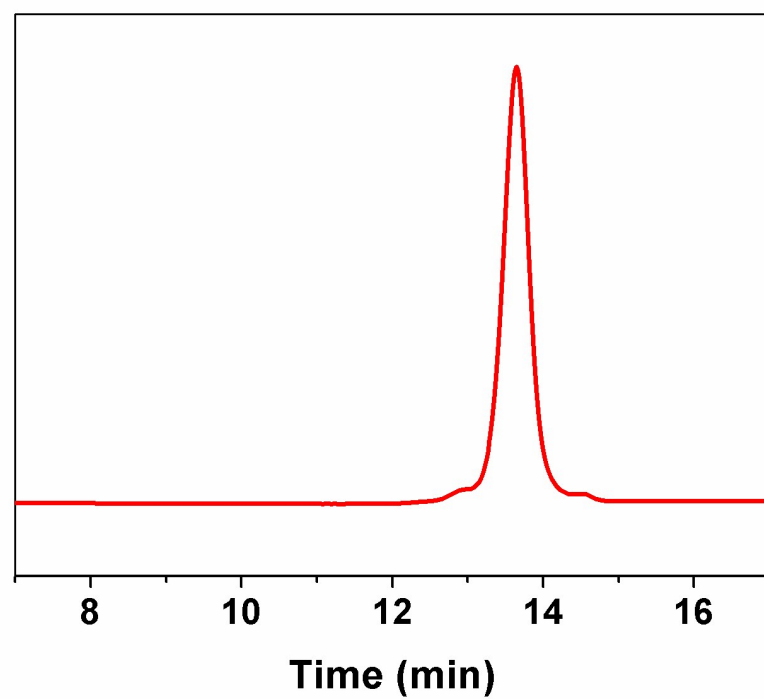

Figure S2. GPC curve of G4 dendrimer in THF.

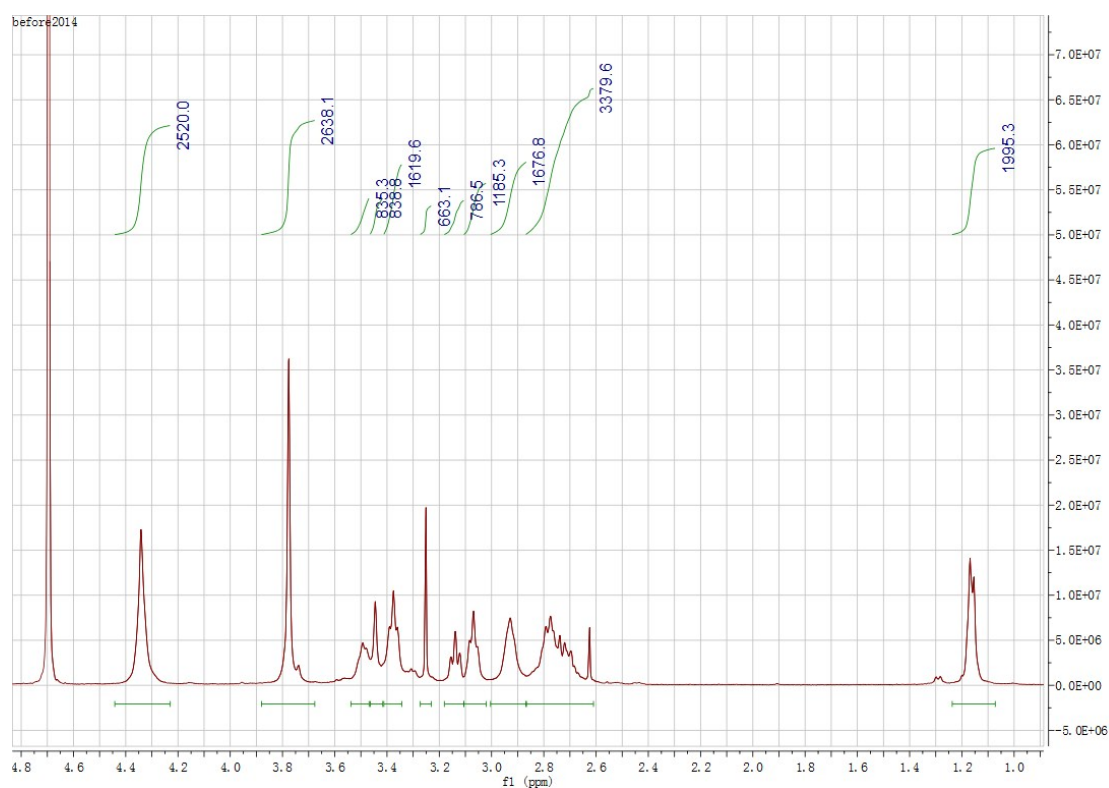

Figure S3. <sup>1</sup>H NMR spectrum of G4-DTPA in D<sub>2</sub>O.
